# Supplementary material
Source: ML conference proceedings conference paper supplement (https://openaccess.thecvf.com/content/ICCV2023/html/Zhai_PEANUT_Predicting_and_ICCV_2023_paper.html)
Supplement: Supplementary file 2 [file Zhai_PEANUT_Predicting_and_ICCV_2023_supplemental.zip]

Archive with 3 entries (3 files):
- README.md
- supp.mp4
- supp.pdf
