# Supplementary material
Source: ML conference proceedings conference paper supplement (https://openaccess.thecvf.com/content/ICCV2023/html/Zhai_PEANUT_Predicting_and_ICCV_2023_paper.html)
Supplement: Supplementary file 2 [file Zhai_PEANUT_Predicting_and_ICCV_2023_supplemental.zip › README.md]

## Supplementary Material

We provide additional experimental details and qualitative results in `supp.pdf`.

We provide a video with a summary of our method and visualizations of navigation episodes in `supp.mp4`. The video is encoded using an h264 (avc1) codec.
